# Supplementary material for: Insights into the metal retention role in the antibacterial behavior of montmorillonite and cellulose tissue-supported copper and silver nanoparticles
Source: Royal Society of Chemistry journal article supplement (doi:10.1039/d1ra02854e), 2021-01-01
Supplement: d1ra02854e1.pdf [file d1ra02854e1.pdf]

## Insights in metal retention role on the antibacterial behavior of montmorillonite and cellulose supported copper and silver nanoparticles

Farzaneh Noori et al.

### SUPPORTING INFORMATION

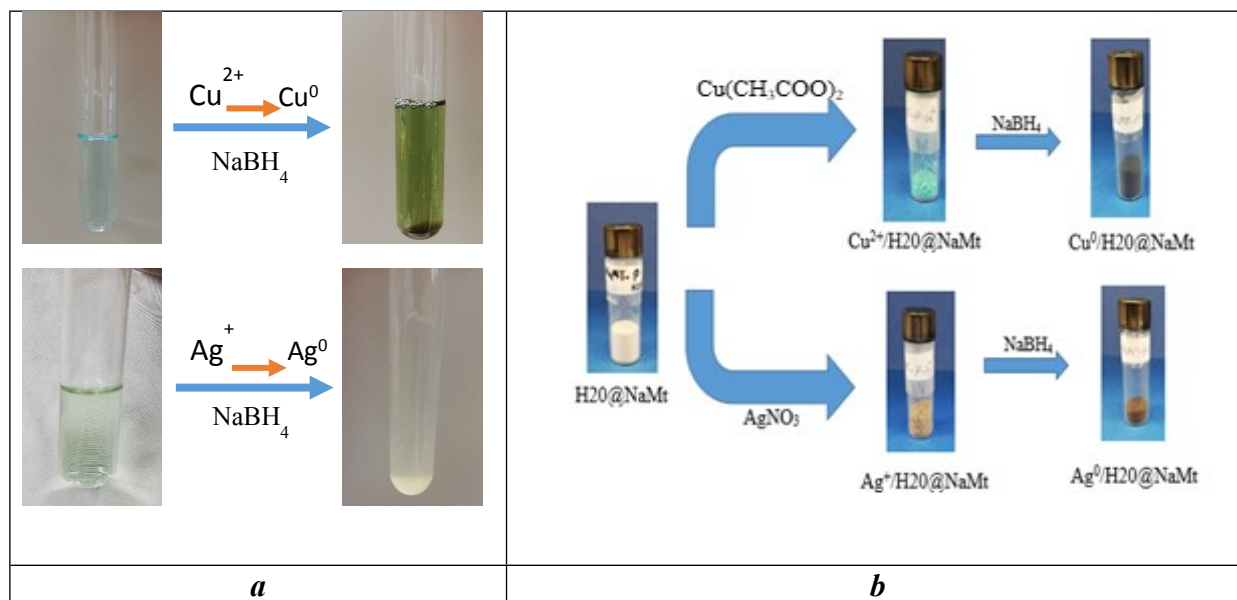

**Fig. S1.** Color changes after reduction of Cu<sup>2+</sup> and Ag<sup>+</sup> in the presence of NaBH<sub>4</sub> (a) and color changes of H<sub>2</sub>O@NaMt composites after MNPs and cation incorporation (b).

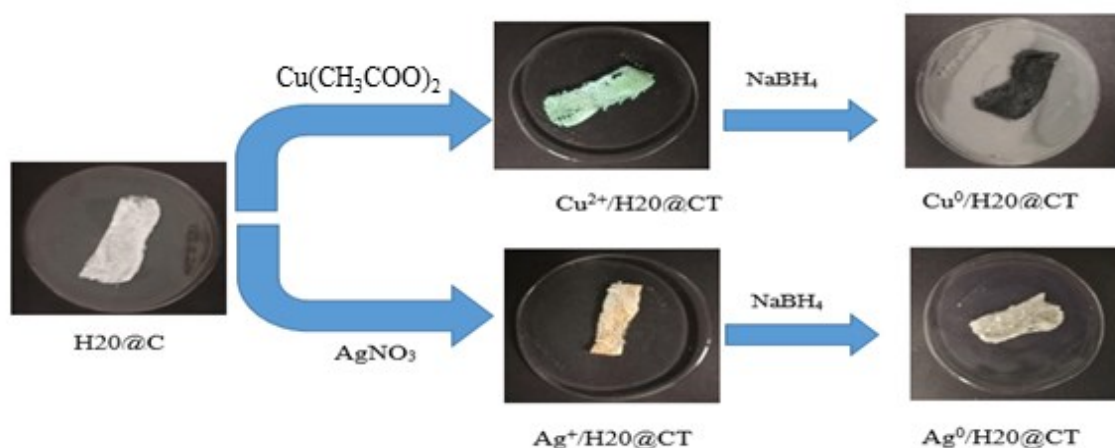

**Fig. S2.** Color changes of cellulose-based samples after the dispersion of metal cation and metal nanoparticles without or with the presence of NaBH<sub>4</sub> respectively.

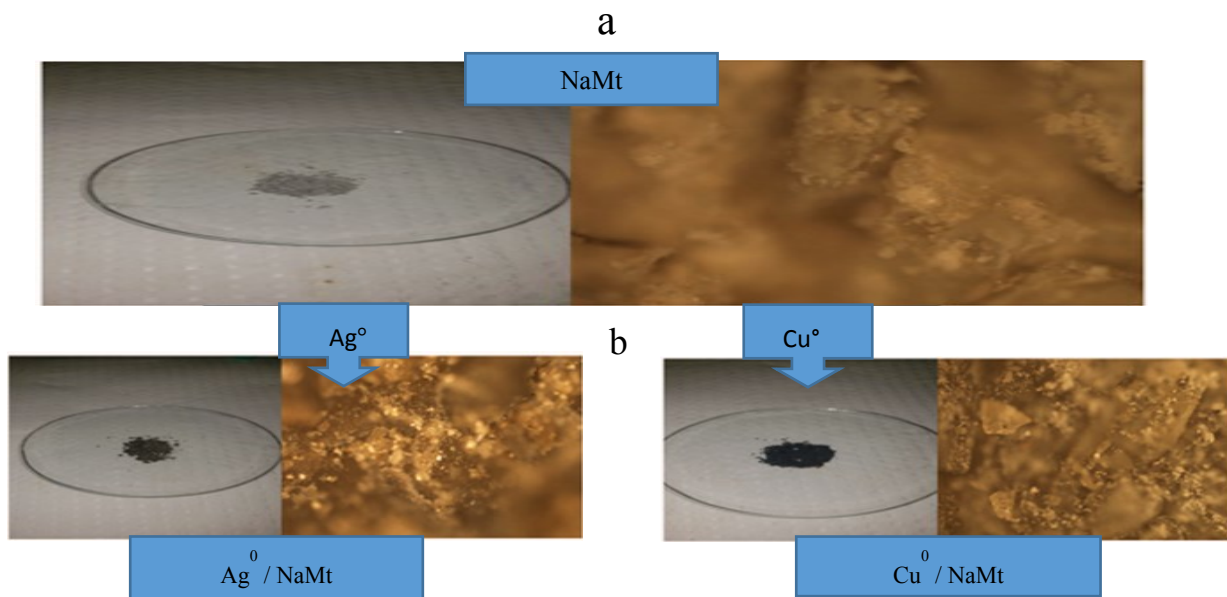

**Fig. S3.** Color changes and optical microscopy images of untreated NaMt (a) and MnPs-loaded NaMt (b).

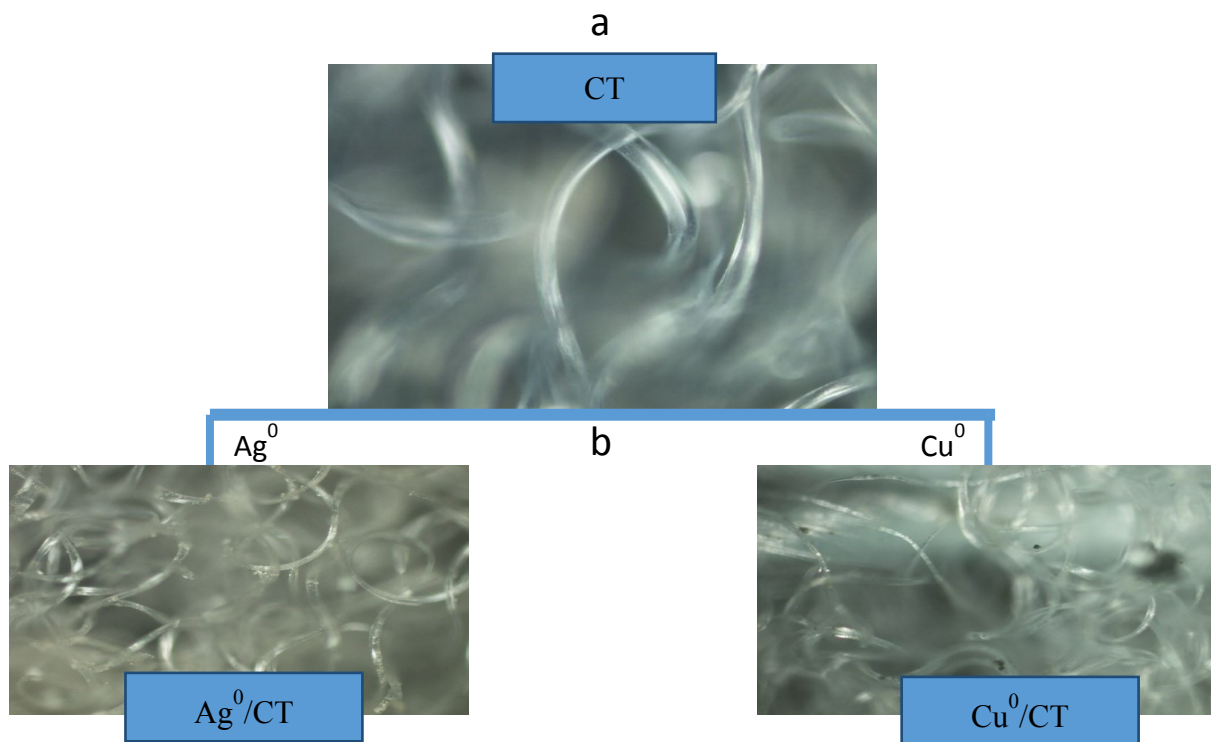

**Fig. S4.** Color changes and optical microscopy image of untreated CT (a) and MnPs-loaded CT (b).

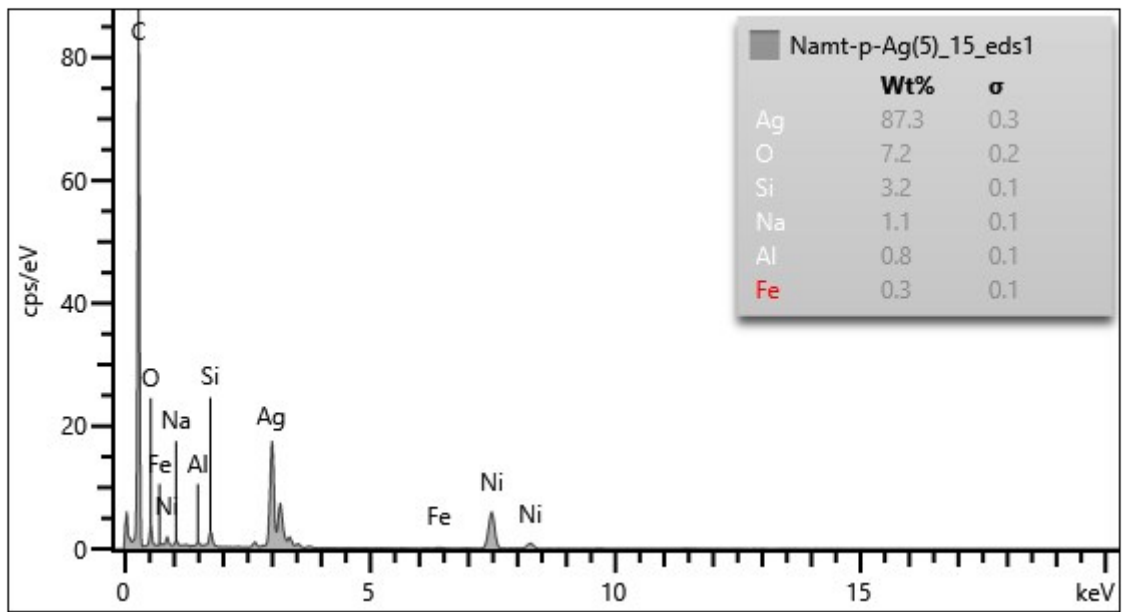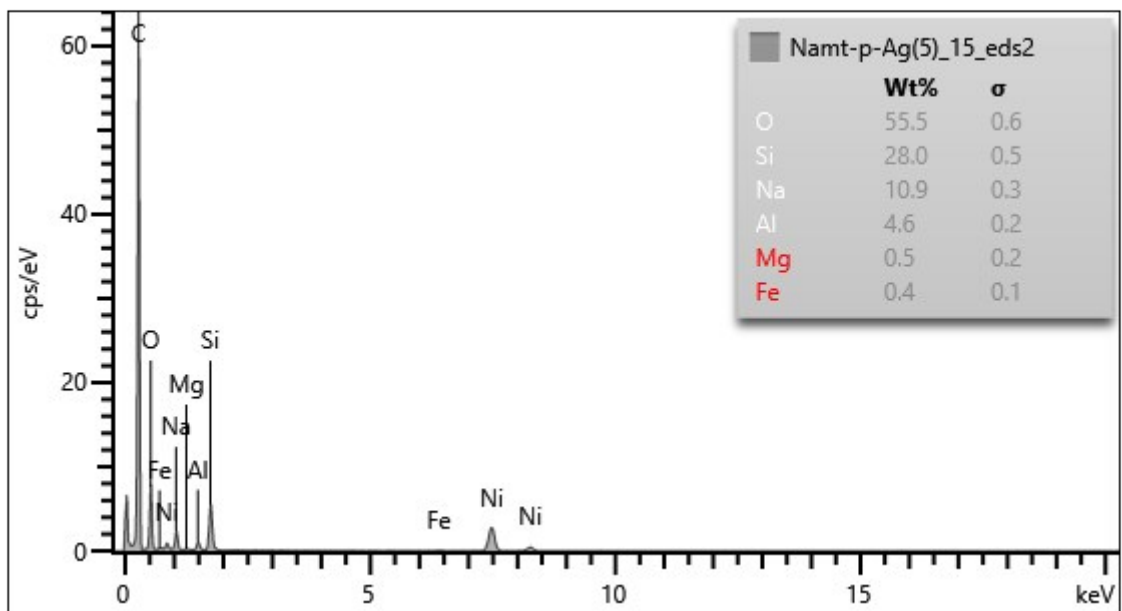

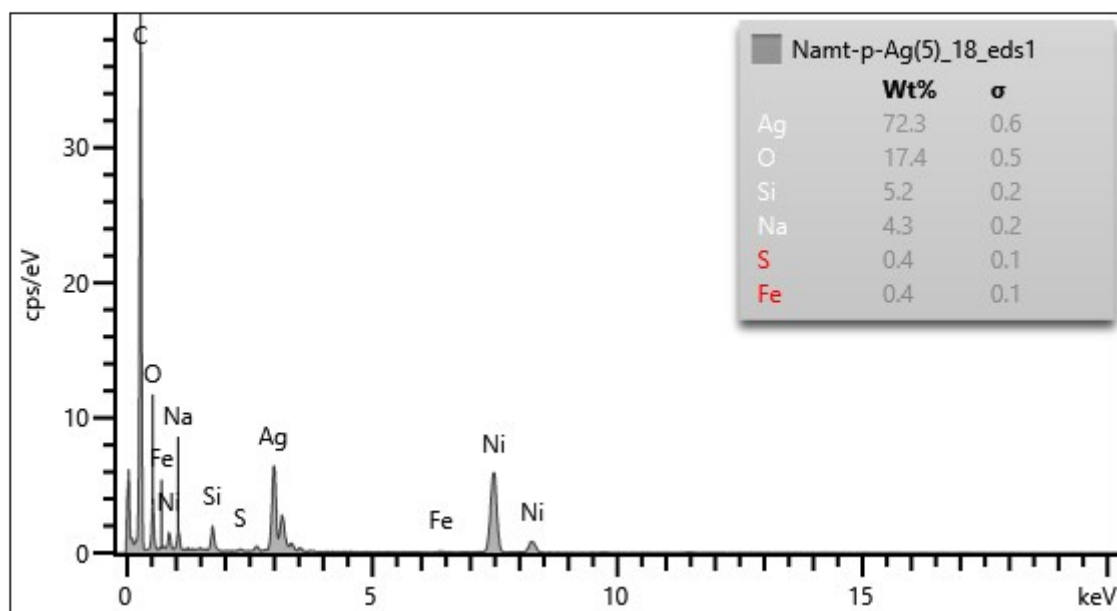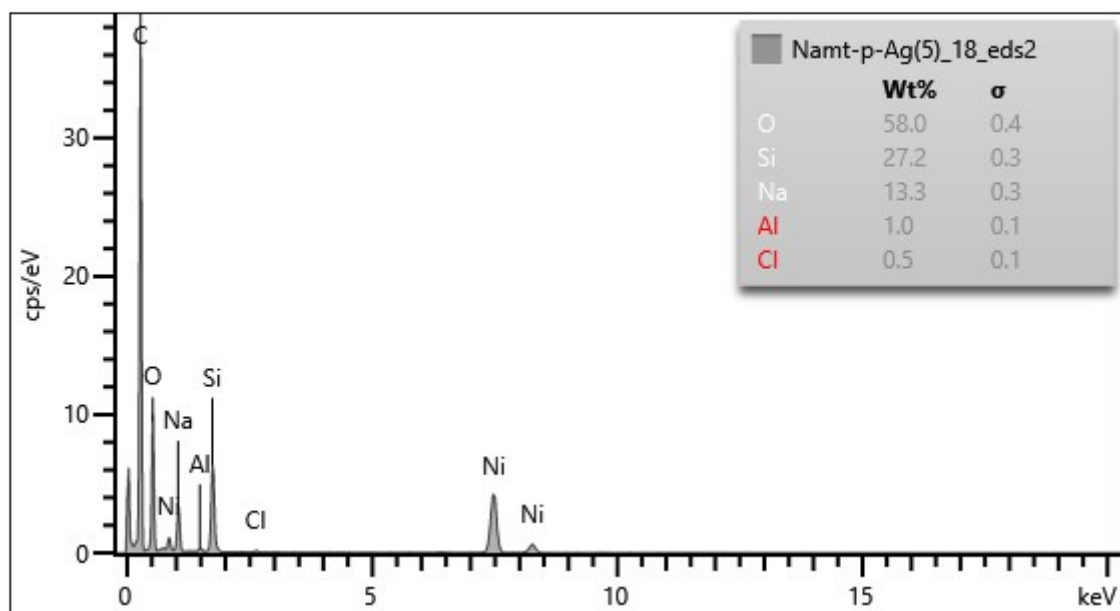

Fig. S5. ED-XRF spectra of some spots on SEM images of Ag<sup>0</sup>/H<sub>2</sub>O-NaMt.

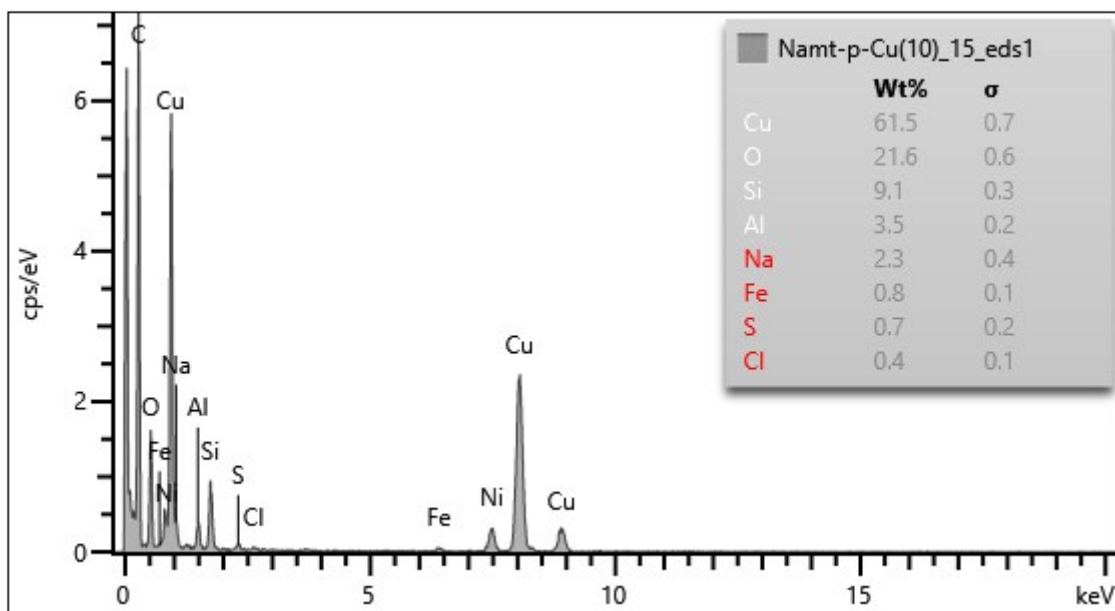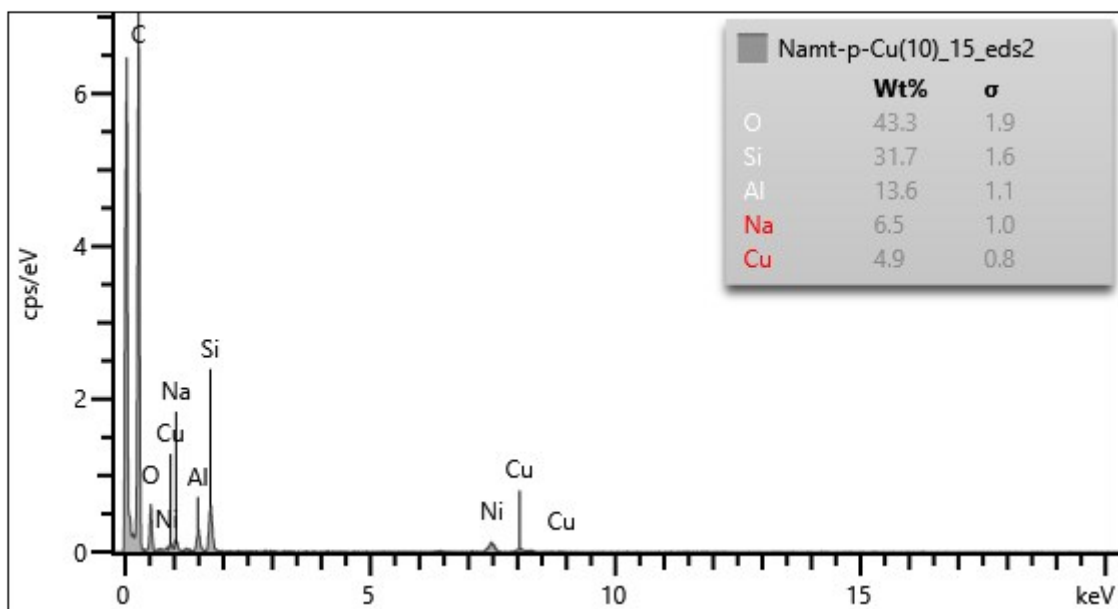

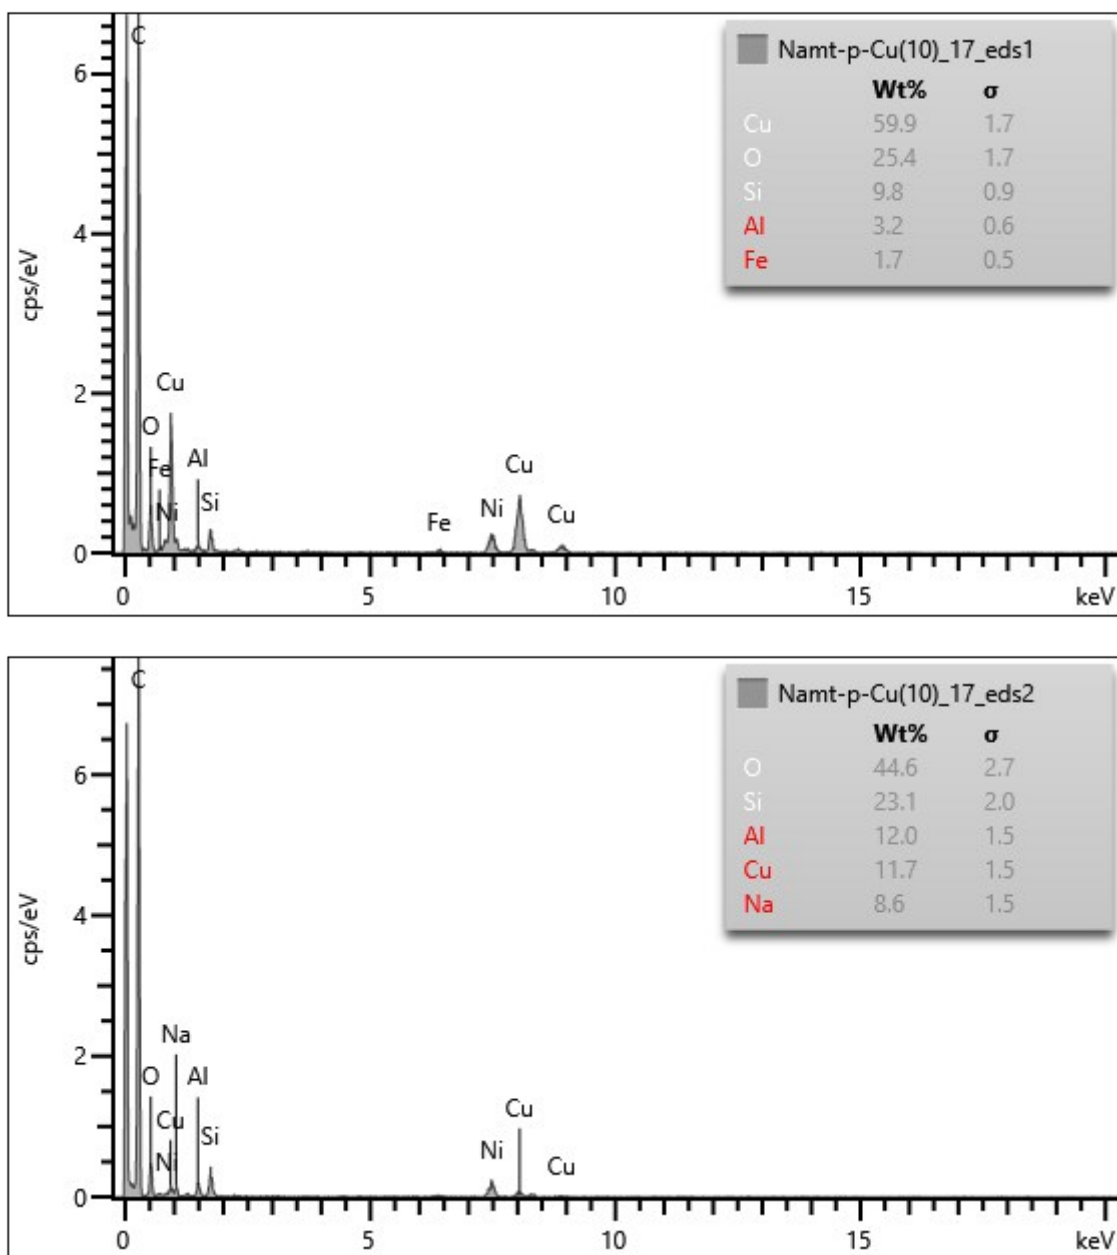

**Fig. S6.** ED-XRF spectra of some spots on SEM images of Cu<sup>0</sup>/H<sub>2</sub>O-NaMt.

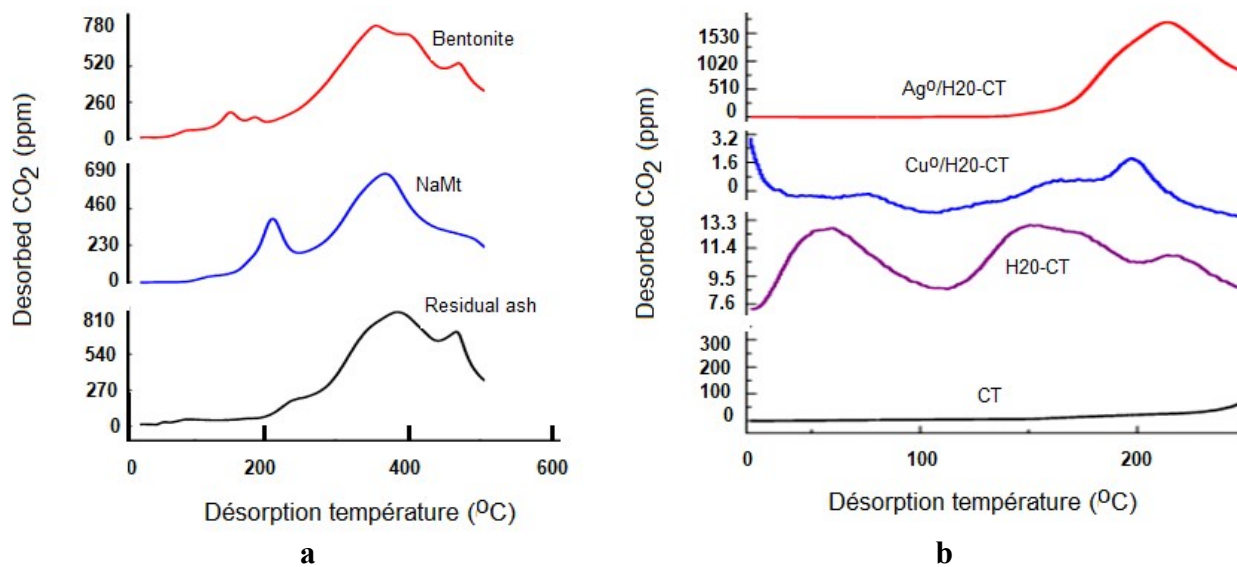

**Fig. S7.** CO<sub>2</sub>-TPD patterns of clay-based samples (a) and CT-based samples (b):

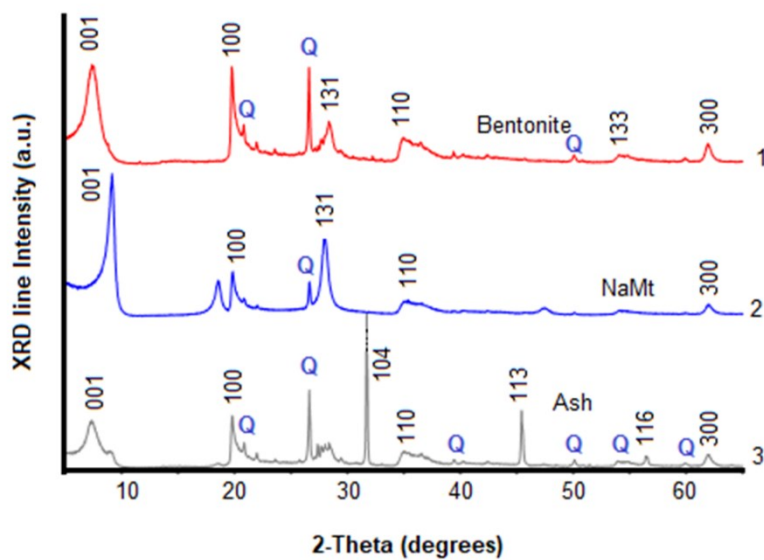

**Fig. S8.** XRD patterns of bentonite (1), NaMt (2)) and residual ash from bentonite purification (3).

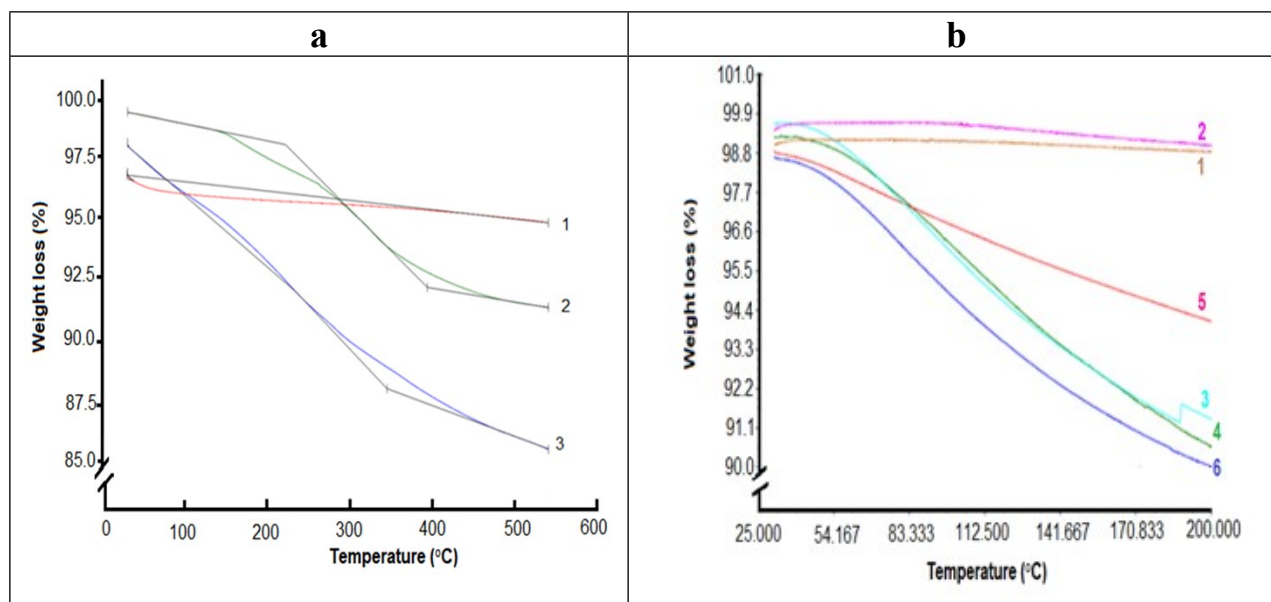

**Fig. S9.** TGA patterns of (a) clay-based samples: NaMt (1), Cu<sup>0</sup>/NaMt (2) and Ag<sup>0</sup>/NaMt (3) and of (b) Cellulose-based materials: CT (1), H2O-CT (2), Cu<sup>0</sup>/CT (3), Ag<sup>0</sup>/CT (4), Cu<sup>0</sup>/H2O-CT (5) and Ag<sup>0</sup>/H2O-CT (6). TGA patterns were recorded between 25 and 700 °C for clay based samples and between 25 and 200 °C for CT-based materials.

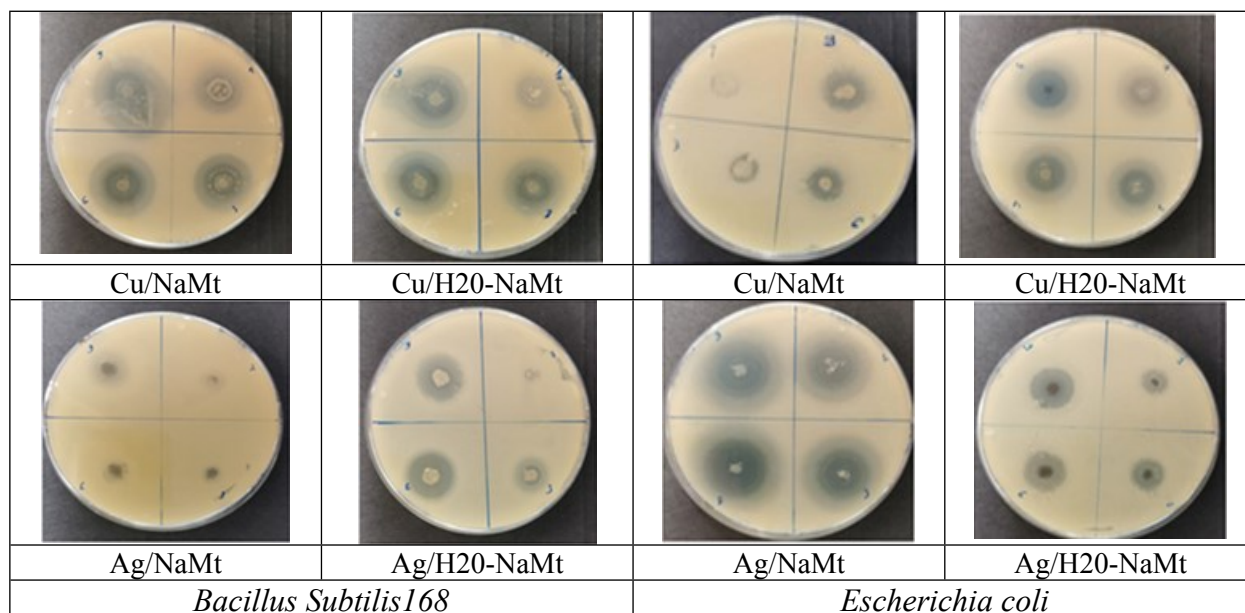

**Fig. S10.** Inhibition zones in *Bacillus Subtilis* 168 proliferation in the presence of NaMt (a) and metal-loaded H2O/NaMt composites (b).



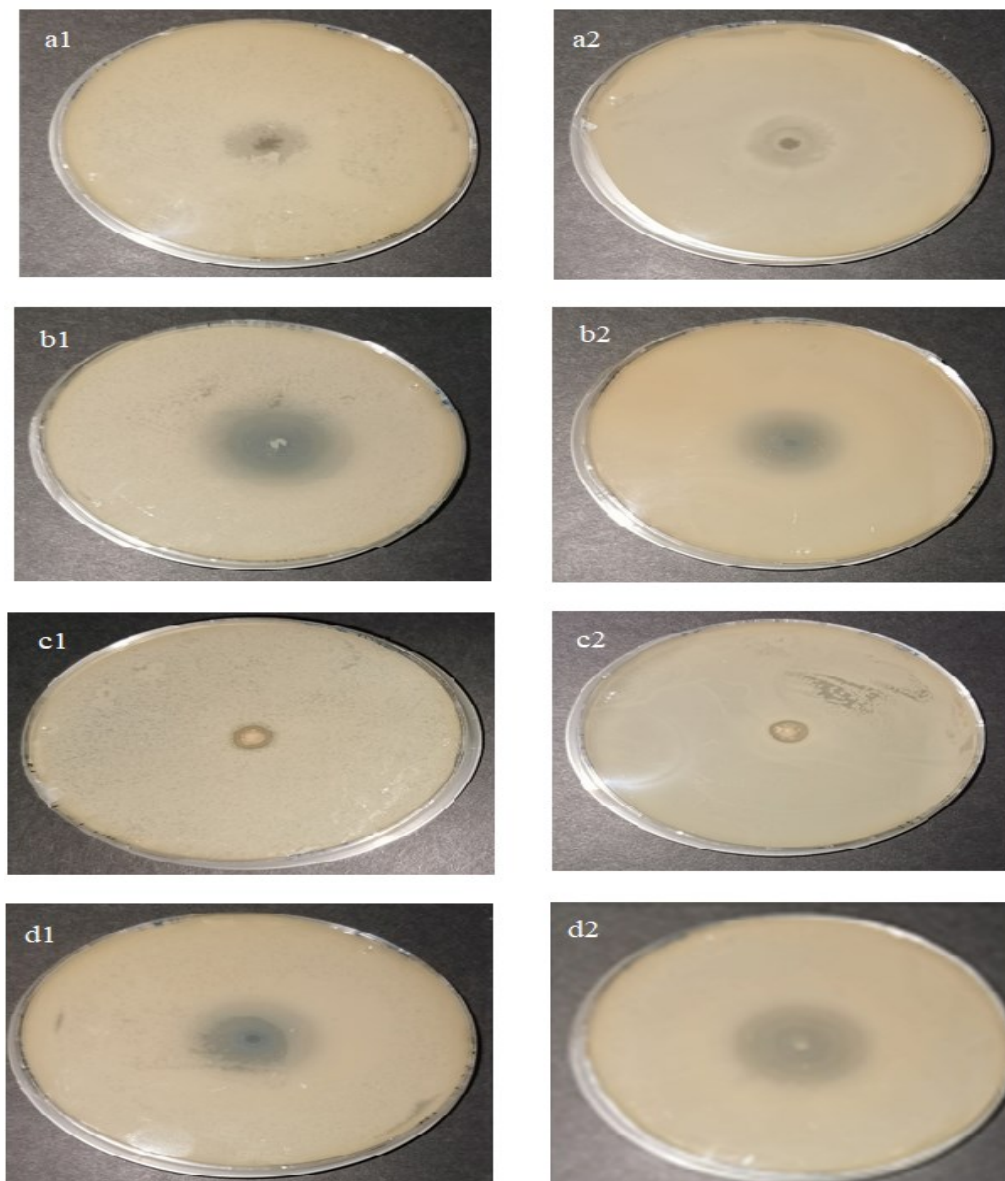

**Fig. S11. Antibacterial test of MNP loaded in organoclay- based samples. *Escherichia coli* (a1, b1, c1 and d1), *Bacillus subtilis*168 (a2, b2, c2 and d2) were incubated for 24h at 37 °C with 5 mg of Ag<sup>0</sup>/H<sub>2</sub>O@NaMt (a1-2); Cu<sup>0</sup>/H<sub>2</sub>O@NaMt (b1-2); Ag<sup>+</sup>/H<sub>2</sub>O@NaMt (c1-2) and Cu<sup>2+</sup>/H<sub>2</sub>O@NaMt (d1-2). This figure should be redesigned as those made by me (Azzouz).**

**Table S1.** Zeta potential, particle size and inhibition zone diameter for clay-based samples

| Samples                   | Zeta potential (mV)* | Particle size (nm)** | pH   | Inhibition zone diameter (cm) |                        |
|---------------------------|----------------------|----------------------|------|-------------------------------|------------------------|
|                           |                      |                      |      | <i>E. coli</i> DH5 $\alpha$   | <i>B. subtilis</i> 168 |
| NaMt                      | -26.56               | 342.7                | 6.01 | 0                             | 0                      |
| Boltorn H2O               | -28.57               | 201.2                | 4.62 | 0                             | 0                      |
| Cu <sup>0</sup> /NaMt     | -23.19               | 221.2                | 9.28 | 1.40                          | 1.83                   |
| Ag <sup>0</sup> /NaMt     | -28.31               | 152.7                | 9.08 | 1.87                          | 1.83                   |
| H2O-NaMt                  | -38.12               | 373.7                | 7.59 | 0                             | 0                      |
| Cu <sup>0</sup> /H2O-NaMt | -26.91               | 164.2                | 9.25 | 1.77                          | 1.83                   |
| Ag <sup>0</sup> /H2O-NaMt | -27.21               | 127.6                | 9.16 | 1.07                          | 1.50                   |

\*Average error on Zeta potential = 6.7%; \*\*Average error on particle size = 5.7%.

**Table S2.** Inhibition zone diameters (cm) for different amounts of metal-loaded clay samples.

| Samples                    | <i>B. subtilis</i> 168 |     |     |     | <i>E. coli</i> DH5 $\alpha$ |     |     |     |
|----------------------------|------------------------|-----|-----|-----|-----------------------------|-----|-----|-----|
|                            | 1                      | 3   | 6   | 9   | 1                           | 3   | 6   | 9   |
| Concentrations (mg powder) |                        |     |     |     |                             |     |     |     |
| NaMt-Cu <sup>0</sup>       | 2,0                    | 2,3 | 2,6 | 3,2 | 0                           | 0,2 | 1,3 | 1,6 |
| NaMt-Ag <sup>0</sup>       | 0                      | 0   | 0,7 | 1,5 | 0                           | 0,9 | 1,3 | 1,6 |
| Cu <sup>0</sup> /NaMt@H2O  | 1,3                    | 1,3 | 1,7 | 3,0 | 0,6                         | 1,7 | 2,1 | 2,4 |
| Ag <sup>0</sup> /NaMt@H2O  | 0,7                    | 1,3 | 2,1 | 2,2 | 0,9                         | 1,4 | 1,6 | 1,8 |
| Cu <sup>2+</sup> /NaMt@H2O | 2,3                    | 2,8 | 3,4 | 3,5 | 2,0                         | 2,4 | 2,5 | 2,5 |
| Ag <sup>+</sup> /NaMt@H2O  | 2,0                    | 2,8 | 3,3 | 3,3 | 0,8                         | 1,1 | 1,2 | 1,7 |
